# Supplementary material for: Composites of Nucleic Acids and Boron Clusters (C2B10H12) as Functional Nanoparticles for Downregulation of EGFR Oncogene in Cancer Cells
Source: MDPI journal article supplement (doi:10.3390/ijms22094863), 2021-05-04

# Composites of nucleic acids and boron clusters (C<sub>2</sub>B<sub>10</sub>H<sub>12</sub>) as functional nanoparticles for downregulation of EGFR oncogene in cancer cells

Damian Kaniowski <sup>1</sup>, Katarzyna Ebenryter-Olbińska <sup>1</sup>, Katarzyna Kulik <sup>1</sup>, Justyna Suwara <sup>1</sup>,  
Wojciech Cypryk <sup>1</sup>, Agata Jakóbiak-Kolon <sup>2</sup>, Zbigniew Leśnikowski <sup>3</sup> and Barbara Nawrot <sup>1,\*</sup>

<sup>1</sup> Centre of Molecular and Macromolecular Studies, Polish Academy of Sciences, Sienkiewicza 112, 90-363 Lodz, Poland; dkanio@cbmm.lodz.pl (D.K.); kebenryt@cbmm.lodz.pl (K.E.O.); kpieta@cbmm.lodz.pl (K.K.); jmilczar@cbmm.lodz.pl (J.S.); wcypryk@cbmm.lodz.pl (W.C.)

<sup>2</sup> Department of Inorganic, Analytical Chemistry and Electrochemistry, Faculty of Chemistry, Silesian University of Technology, Krzywoustego 6, 44-100 Gliwice, Poland; agata.jakobik-kolon@polsl.pl (A.J.K.)

<sup>3</sup> Institute of Medical Biology, Polish Academy of Sciences, Laboratory of Medicinal Chemistry, Lodowa 106, 92-232 Lodz, Poland; zlesnikowski@cbm.pan.pl (Z.L.)

\* Correspondence: bnawrot@cbmm.lodz.pl; Tel.: +48-42-6803248

## Supplementary Materials:

**Table S1.** Sequence and spectral (MS, UV) and chromatographic data of tripeds 1,2,FL-1, FL-2, ASO-22 and RNA.

| Comp. No. | Oligonucleotide sequence                                                            | MW <sub>calc.</sub> | <i>m/z</i>            | Rt [min] <sup>a</sup> | λ <sub>max</sub> [nm] |
|-----------|-------------------------------------------------------------------------------------|---------------------|-----------------------|-----------------------|-----------------------|
| ASO-22    | 5'-d(TTT CTT TTC CTC CAG AGC CCGA)-3'                                               | 6612.28             | 6612.07 <sup>b</sup>  | 12.94                 | 263                   |
| RNA       | 3'-AAA GAA AAG GAG GUC UCG GGCU-5'                                                  | 7167.38             | 7168.27               | 15.3                  | 256                   |
| ASO-C     | 5'-d(ATG AAG GTT CAA TCT GAT TTT)- 3'                                               | 6450.3              | 6450.12               | 12.76                 | 259                   |
| 1         | 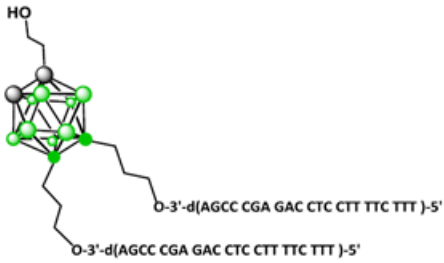 | 13652.92            | 13653.55 <sup>c</sup> | 13.38                 | 261                   |

|      |                                                                                    |          |                       |       |           |
|------|------------------------------------------------------------------------------------|----------|-----------------------|-------|-----------|
| 2    | 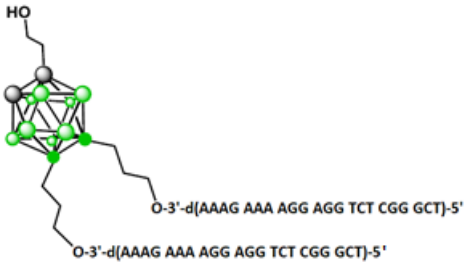  | 14143.29 | 14143.75 <sup>c</sup> | 12.47 | 258       |
| FL-1 |   | 14724.91 | 14718.02 <sup>c</sup> | 14.30 | 261 / 494 |
| FL-2 |  | 15215.30 | 15208.50 <sup>c</sup> | 13.69 | 257 / 494 |

<sup>a</sup> The RP-HPLC conditions are described in the Materials and methods section. <sup>b</sup> The m/z ratio of an ion is measured by MALDI-TOF MS. <sup>c</sup> The m/z ratio of an ion is measured by ESI-Q-TOF MS.

**Figure S1. RP-HPLC preparative (A) and analytical (B) analysis of triped FL-1**

**A**

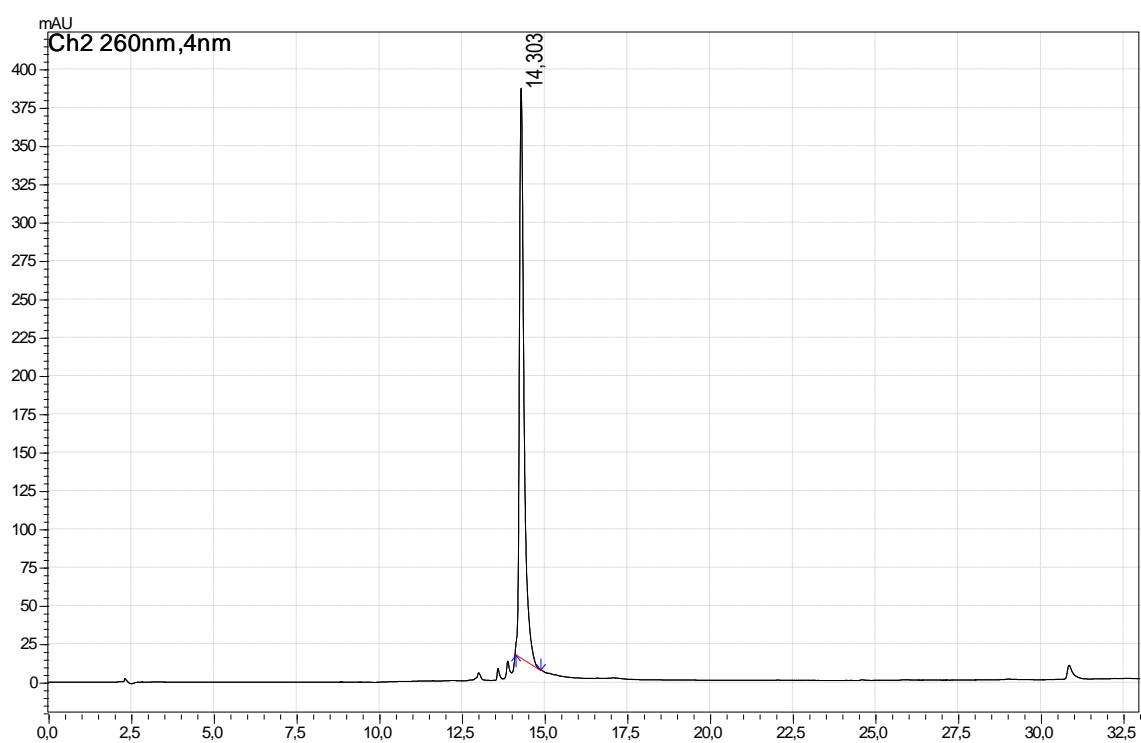

**B**

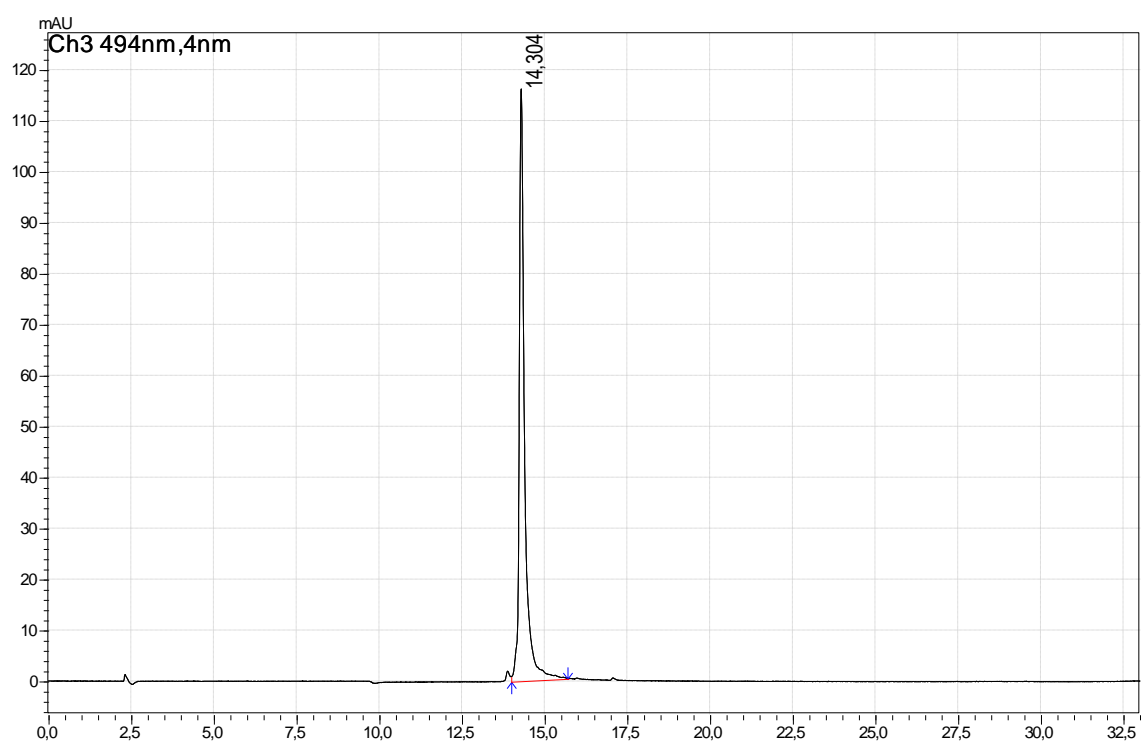

RP-HPLC conditions were as follow: the buffer A (0.1 M  $\text{CH}_3\text{COONH}_4$ ) and buffer B (100%  $\text{CH}_3\text{CN}$ ). The buffer B gradient: 0→2 min 0%; 2→25 min 0-45%; 25→28 min 45-60%; 28→30 min 60-0%; 30→33 min 0%.

**Figure S2 RP-HPLC preparative (A) and analytical (B) analysis of triped FL-2**

**A**

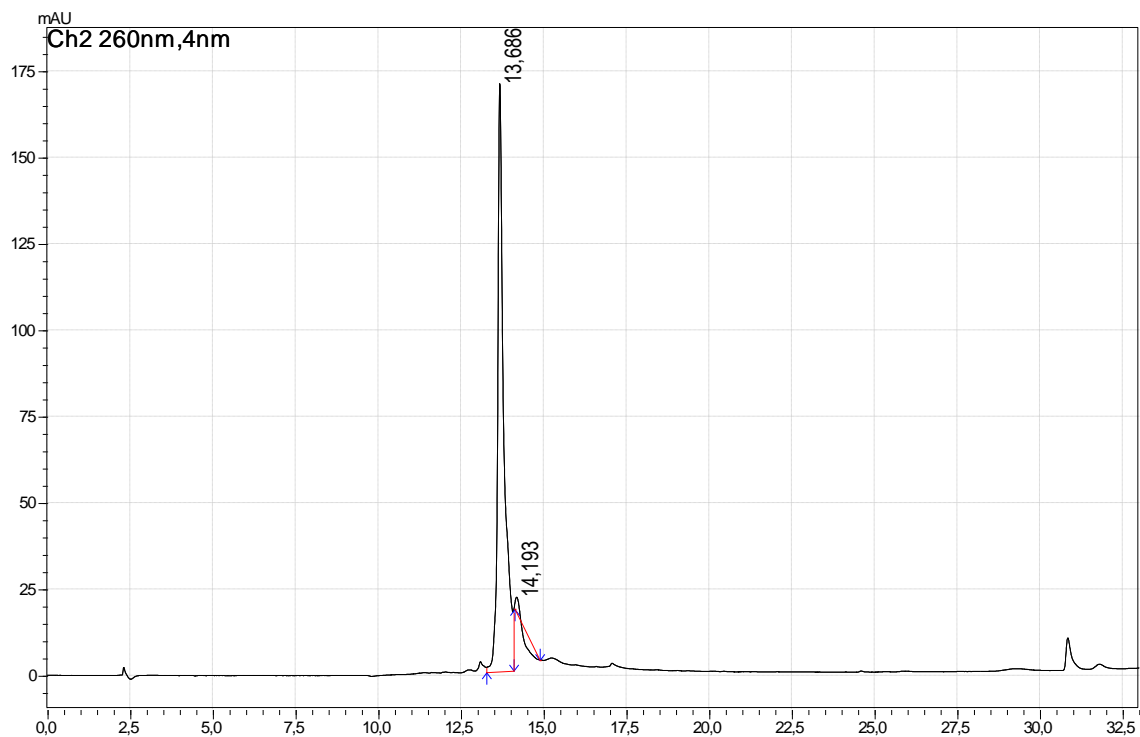

**B**

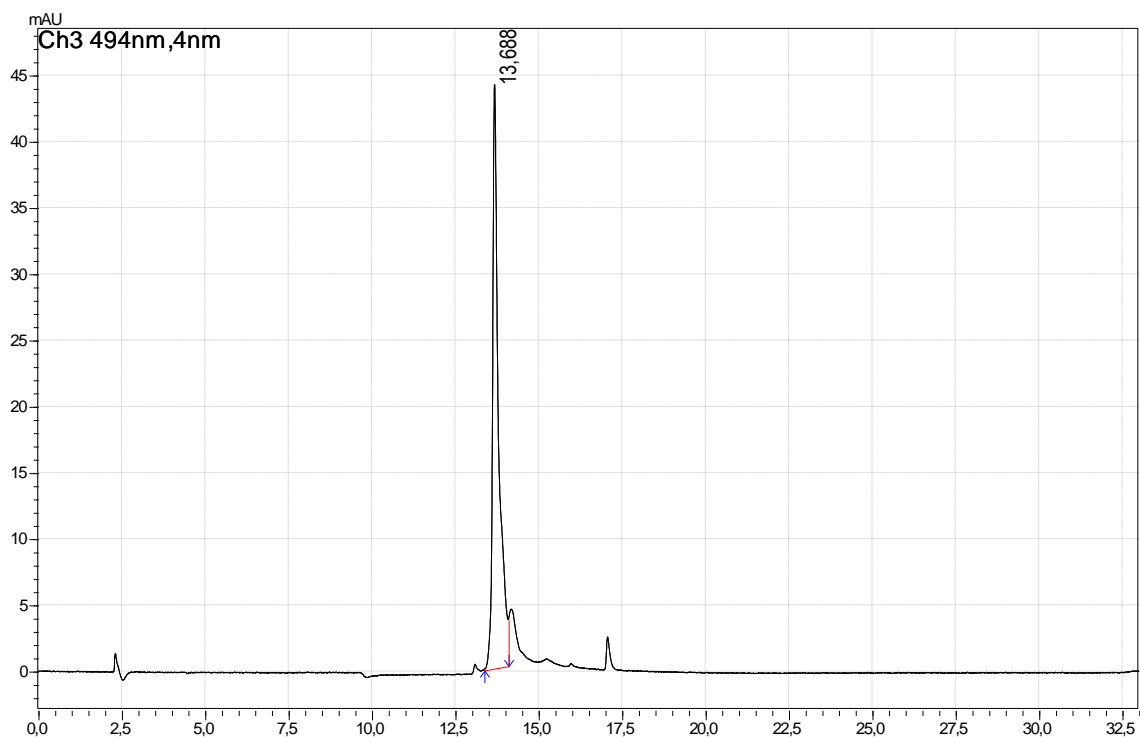

RP-HPLC conditions were as follow: the buffer A (0.1 M  $\text{CH}_3\text{COONH}_4$ ) and buffer B (100%  $\text{CH}_3\text{CN}$ ). The buffer B gradient: 0→2 min 0%; 2→25 min 0-45%; 25→28 min 45-60%; 28→30 min 60-0%; 30→33 min 0%.

**Figure S3** ESI-Q-TOF mass spectrometry analysis of triped **FL-1** (A) and **FL-2** (B).

A) **FL-1**. M.W. calc: 14724.91.;  $m/z$ : 14718.02

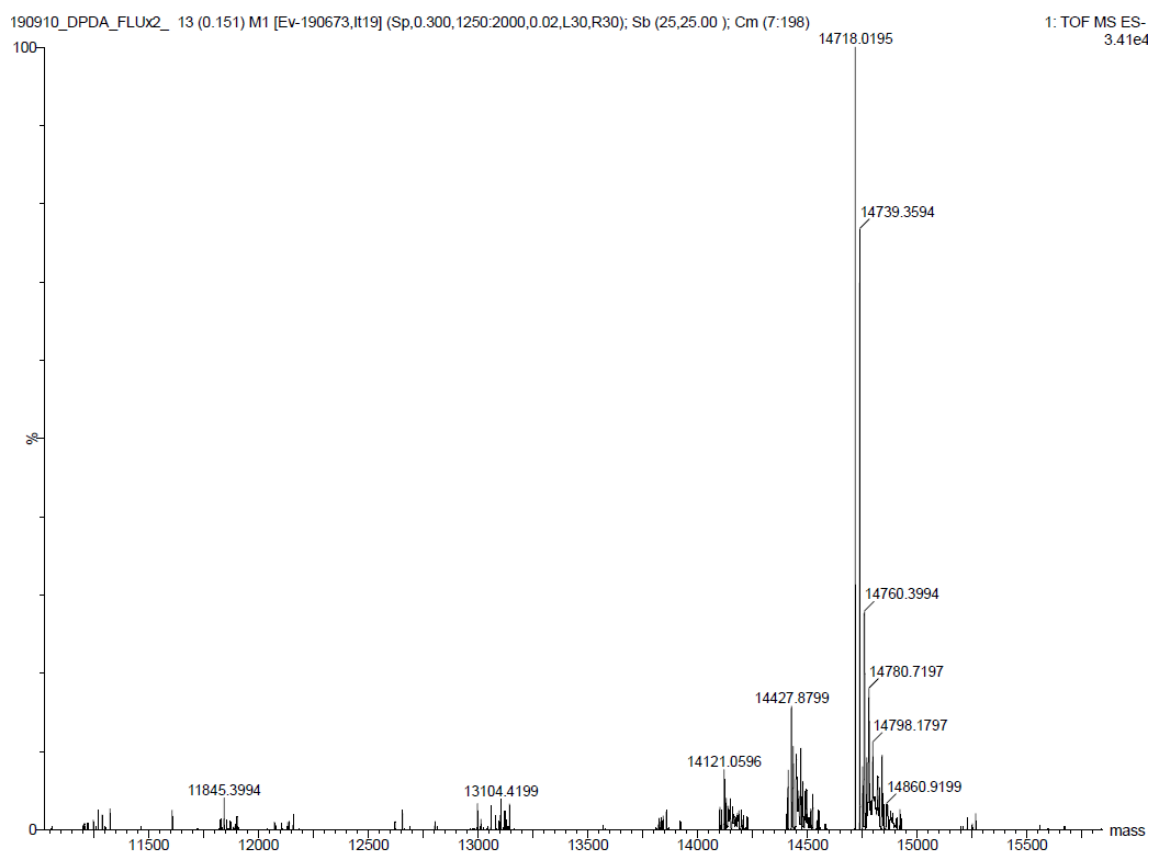

B) **FL-2** M.W. calc: 15215.;  $m/z$ : 15208.50

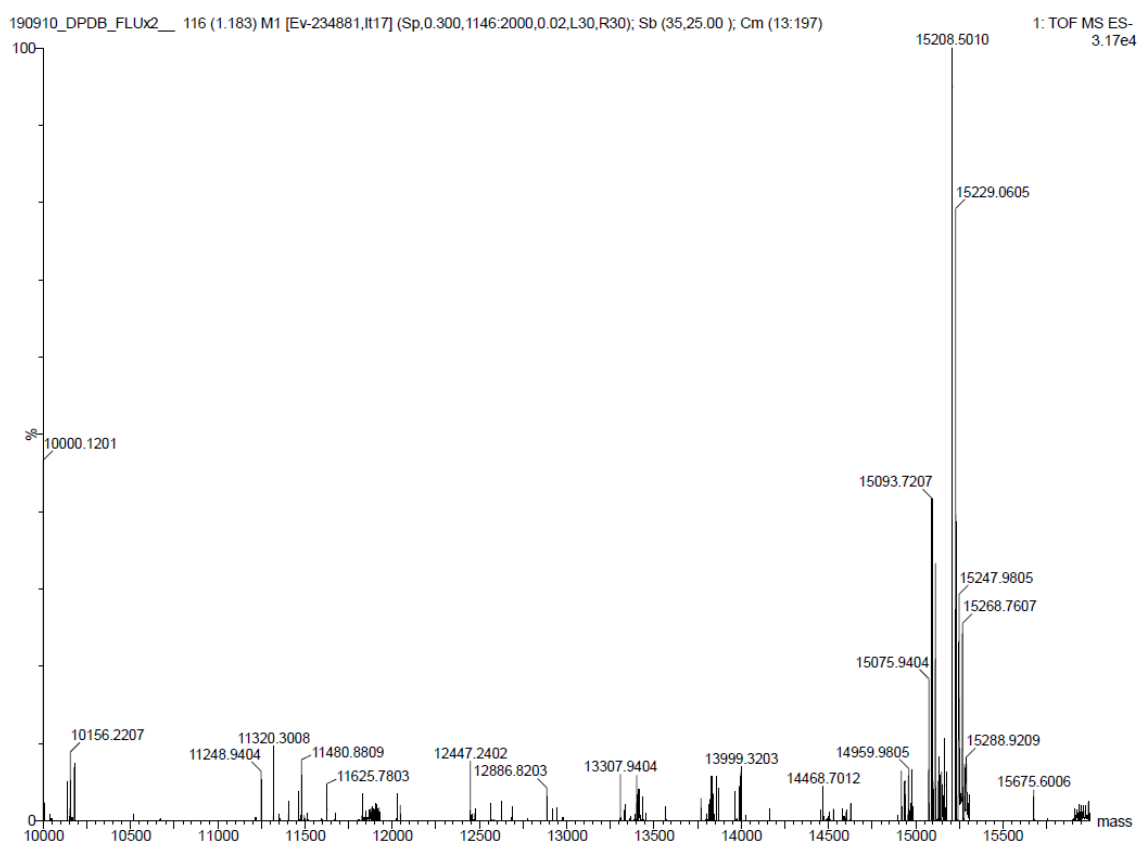

Figure S4 RP-HPLC analytical analysis (A) and ESI-Q-TOF mass spectrometry analysis (B) of ASO-C

A

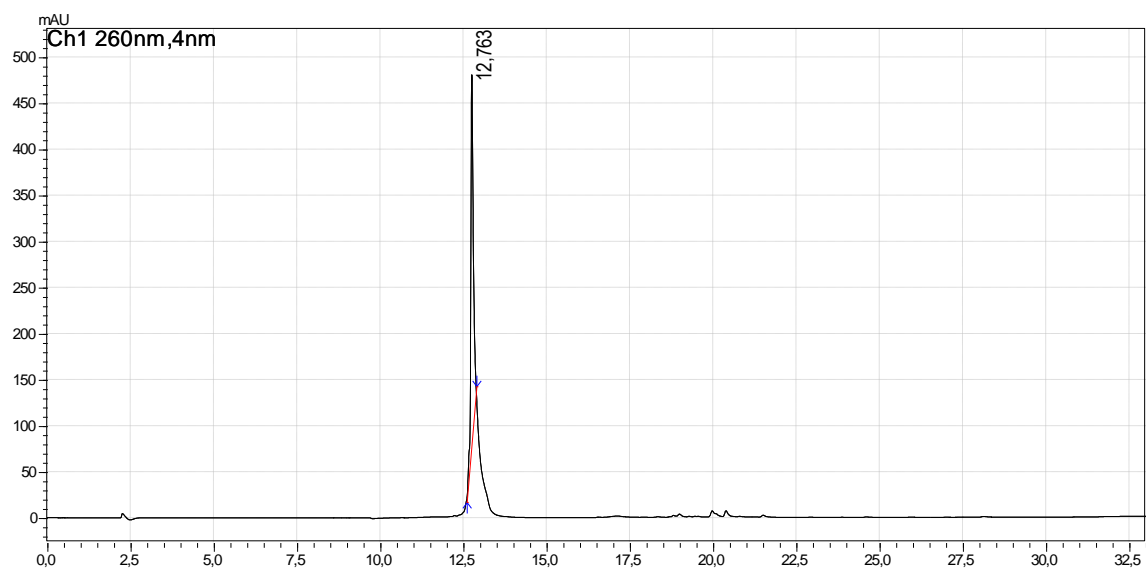

B

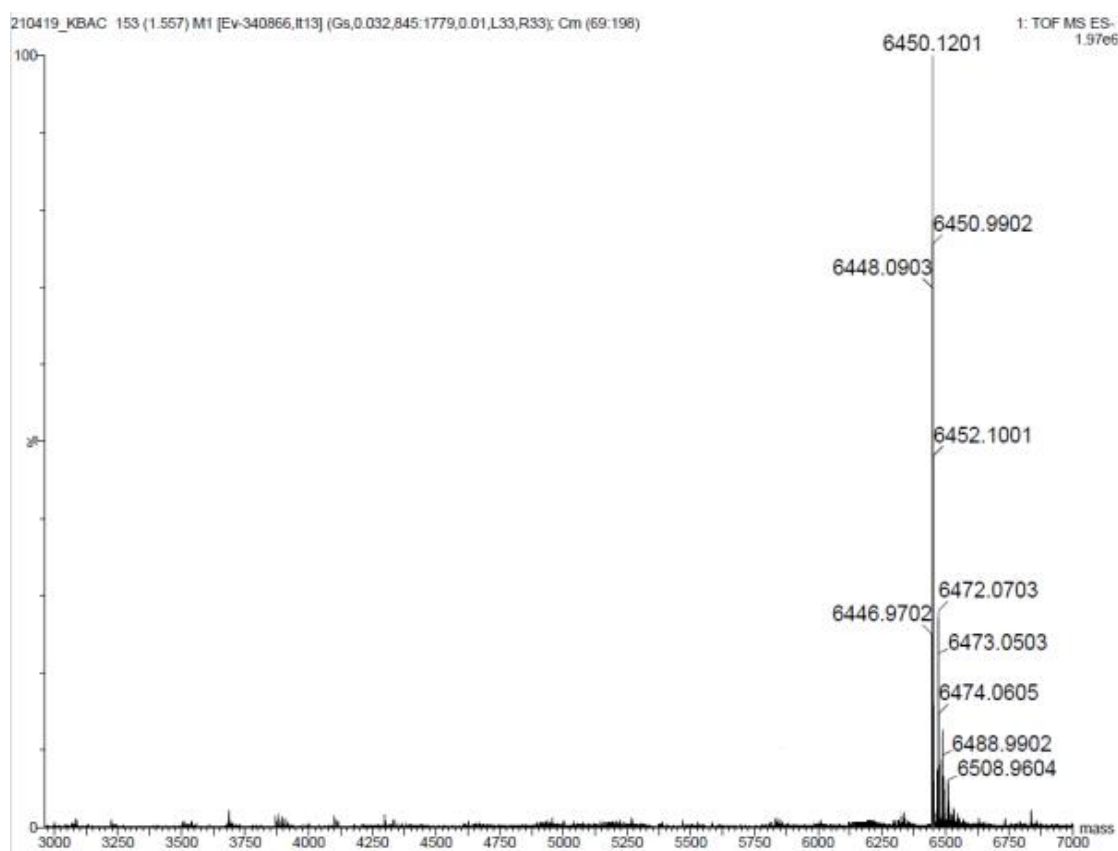

**Figure S5.** The efficiency of annealing of **1** and **2** (1:1 molar ratio) (lane 2) analyzed by non-denaturing PAGE and visualized by Stains All.

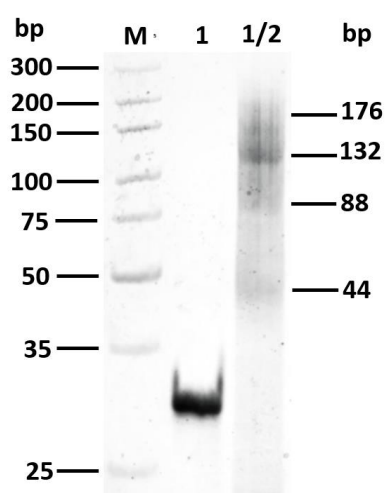

**Figure S6.** Prolonged incubation time of the cleavage reaction of RNA-1 up to 240 min with RNase H resulted in the increase of the content of 6-nt product for tripped **1** and constant level products 9-nt and 7-nt RNA for oligonucleotide ASO-22.

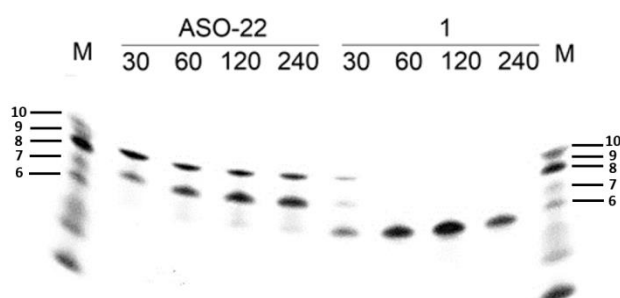

**Figure S7.** The agarose electrophoretic analysis of the PCR products of the cellular DNA isolated from A431, HeLa, MCF-7 cells amplified with the EZ-PCR™ Mycoplasma Detection Kit (BI, Cromwell, USA). Commercial negative (**Cn**) and positive controls of mycoplasma (**Cp**) were used for PCR reaction. The lack of the contamination product in DNA of tested cells is demonstrated.

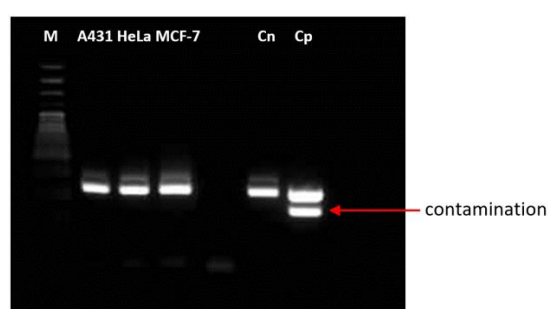

**Figure S8.** Silencing activity of ASO-22 and **1/2** (50 and 100 nM) towards the exogenous EGFR mRNA monitored by fluorescence microscopy in a dual EGFR-EGFP/RFP fluorescence assay in A431 cells (DFA). The upper row presents the level of a green fluorescence representing the fusion EGFR-EGFP protein and the lower row presents expression of the red fluorescence protein (RFP) (control).

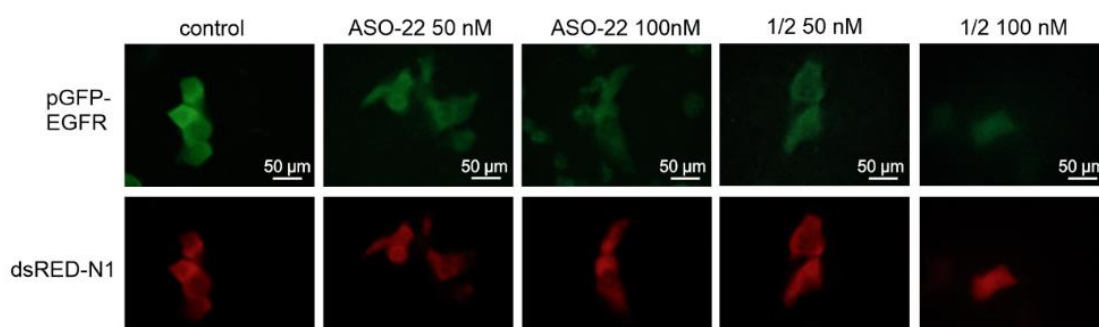

**Figure S9.** DAPI and FITC filters test demonstrating no emission signals of FITC and DAPI due to the DAPI and FITC fluorophores excitation, respectively. (A) A431 cells transfected with **FL-1/FL-2** (4 µM) cells in the presence of lipofectamine 2000 and analyzed with the FITC filter (exposure time 1s) and checked with the DAPI filter (1s and 2s); (B) A431 cells treated with DAPI (5 µg/mL) and analyzed using a DAPI filter (exposure time 300ms) and checked using a FITC filter (exposure time 300ms and 1s).

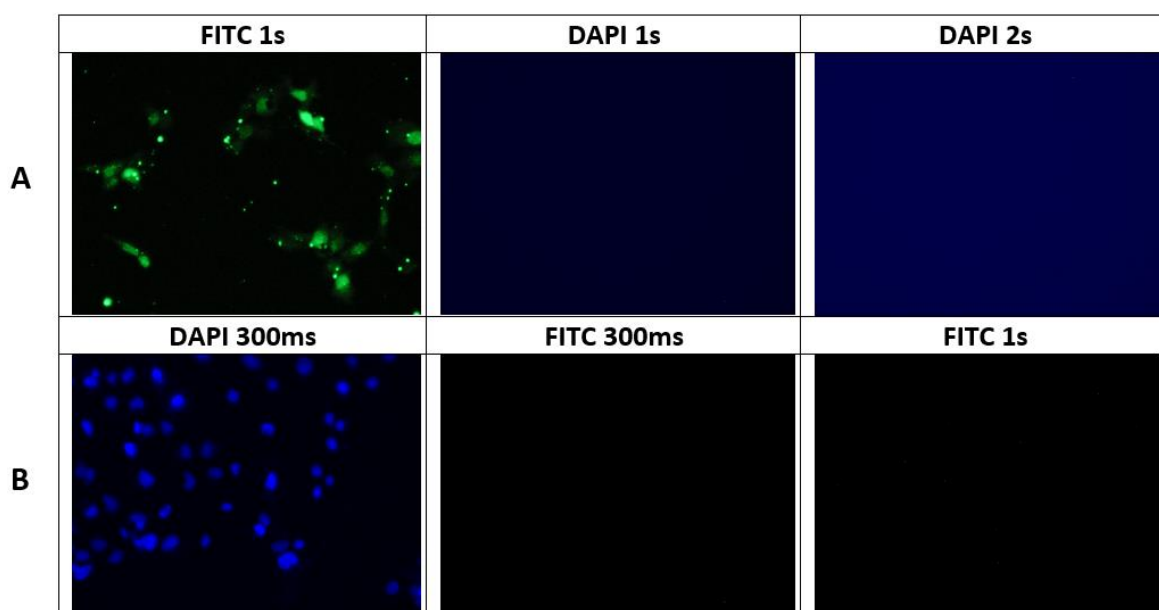



**Figure S10.** FACS analysis with confidence interval (CI) and the mean with standard deviation ( $\pm$ SD).

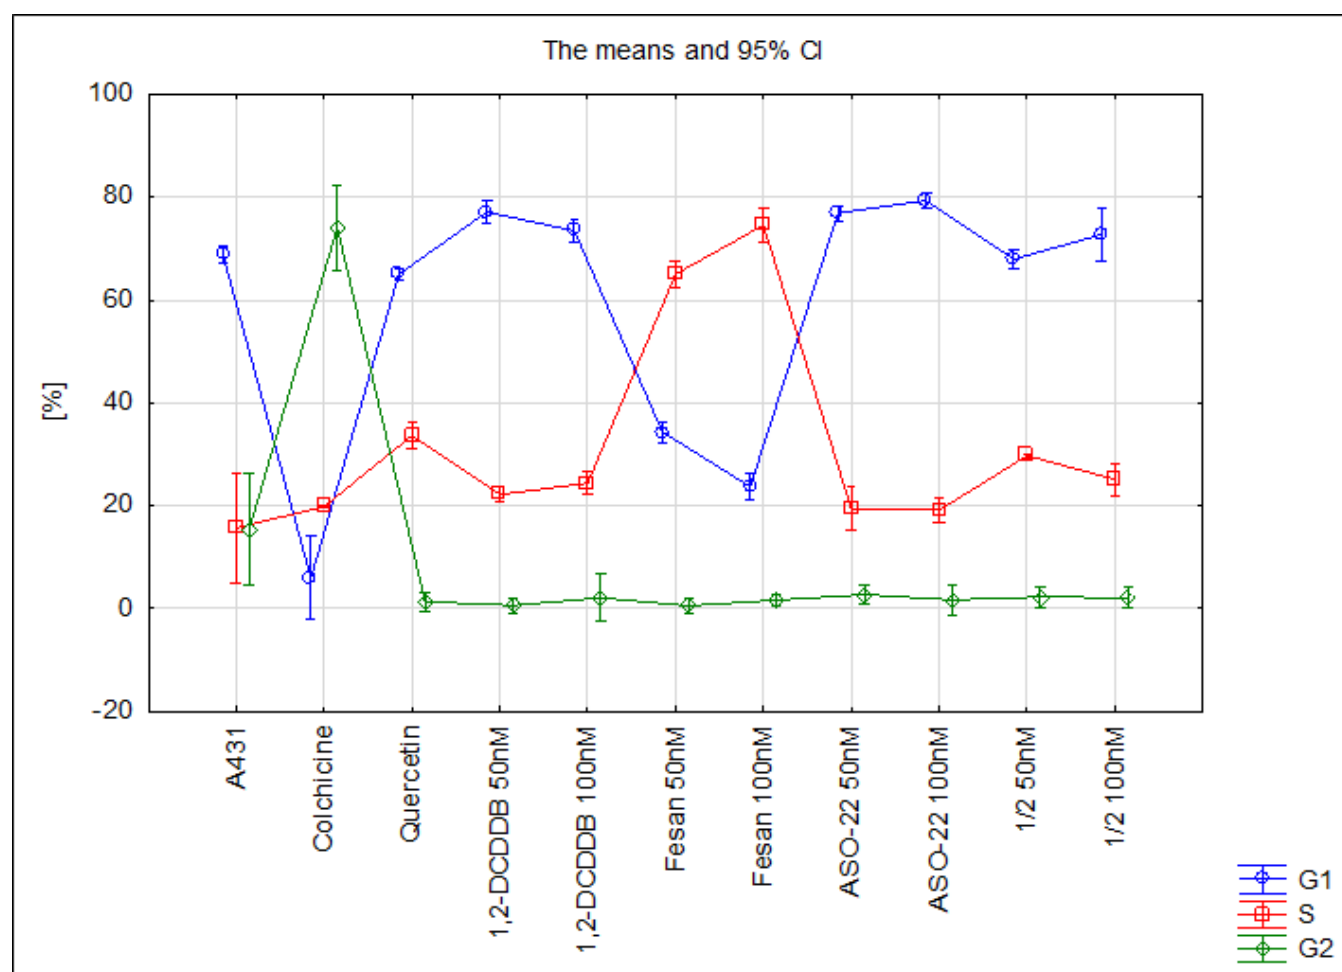

Supplement: s1 [file s1]
